# Supplementary material
Source: MDPI journal article supplement (https://www.mdpi.com/2073-4441/11/1/90)
Supplement: s1 [file s1]

## Supplementary Materials

# The combination of coagulation and adsorption for controlling ultrafiltration membrane fouling in water treatment

Fan Bu, Baoyu Gao\*, Qinyan Yue, Caiyu Liu, Wenyu Wang, Xue Shen

Shandong Key Laboratory of Water Pollution Control and Resource Reuse, School of Environmental Science and Engineering, Shandong University, Qingdao 266237, China;

\* Correspondence: baoyugao\_sdu@aliyun.com;

Table S1. Main properties of PAC

| Average particle size ( $\mu\text{m}$ ) | BET surface area ( $\text{m}^2/\text{g}$ ) | Average pore size (nm) | Zeta potential (mV) |
|-----------------------------------------|--------------------------------------------|------------------------|---------------------|
| $41 \pm 0.7$                            | $812 \pm 13$                               | $3.1 \pm 0.2$          | $-22.5 \pm 0.3$     |

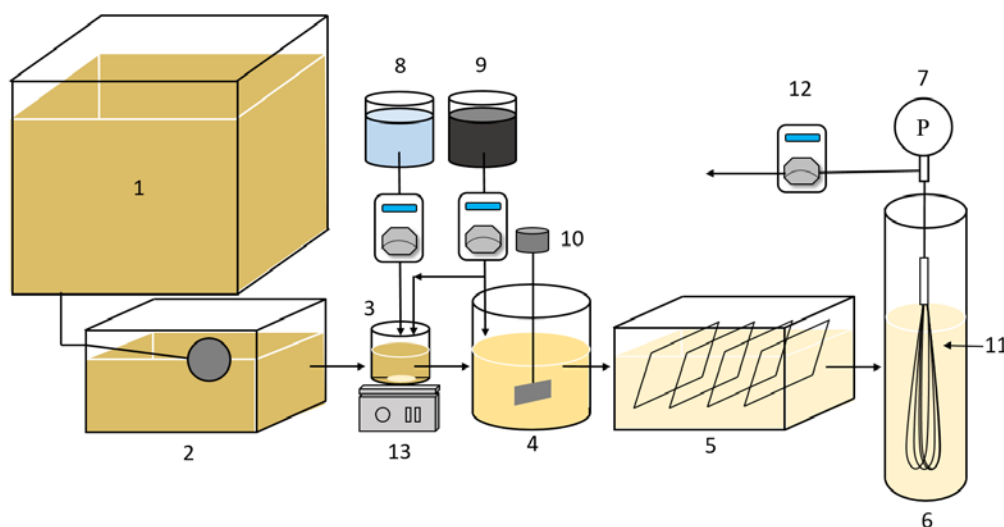

**Figure S1.** Schematic diagram of ultrafiltration sys. 1 - raw water tank, 2 - constant-level water tank, 3 – rapid mixing unit, 4 - slow mixing unit, 5 – sedimentation tank, 6 – ultrafiltration tank, 7 - pressure transmitters, 8 – coagulant tank, 9 – adsorbent tank, 10 – mechanical stirrer, 11 – ultrafiltration membrane, 12 – peristaltic pump 13 – magnetic stirrer

\* Corresponding author.

E-mail: baoyugao\_sdu@aliyun.com; bygao@sdu.edu.cn (Baoyu Gao)

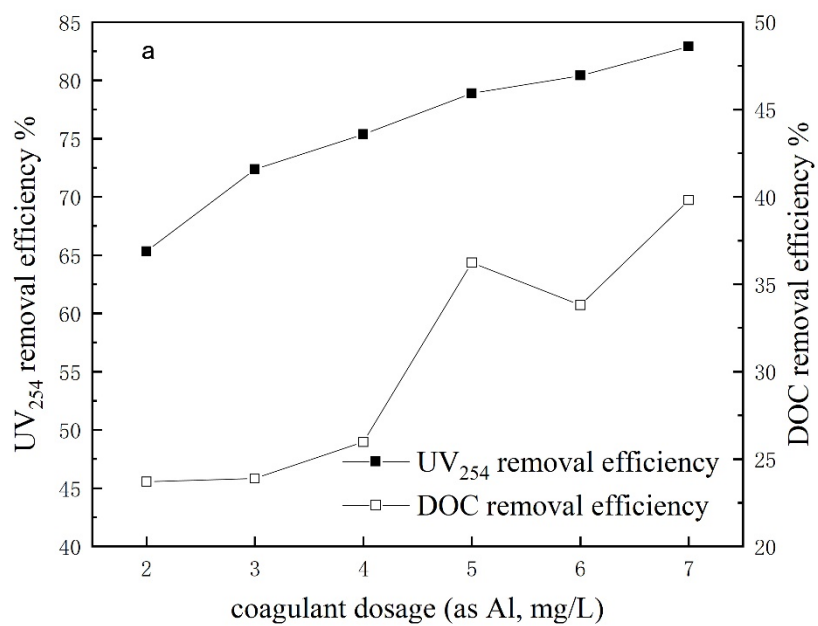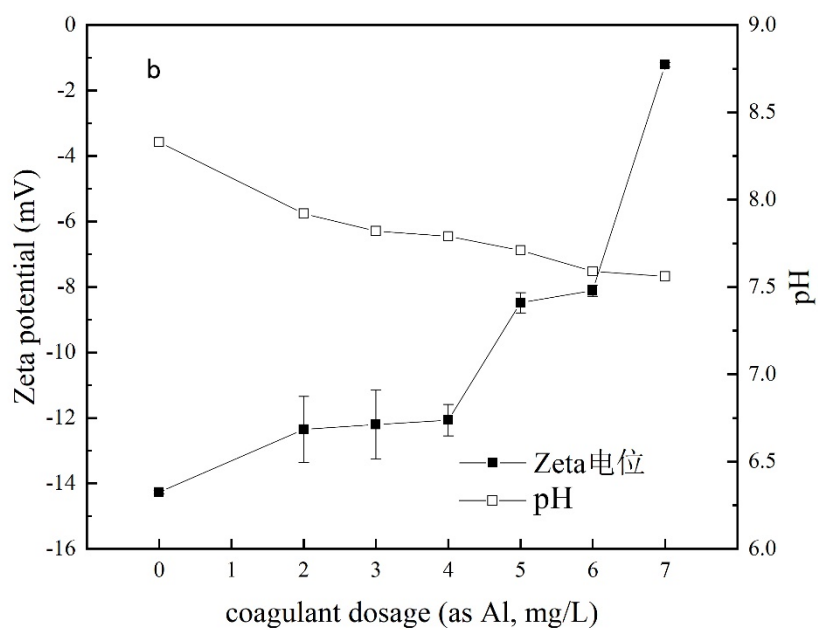

Figure S2. The optimization of the coagulation process

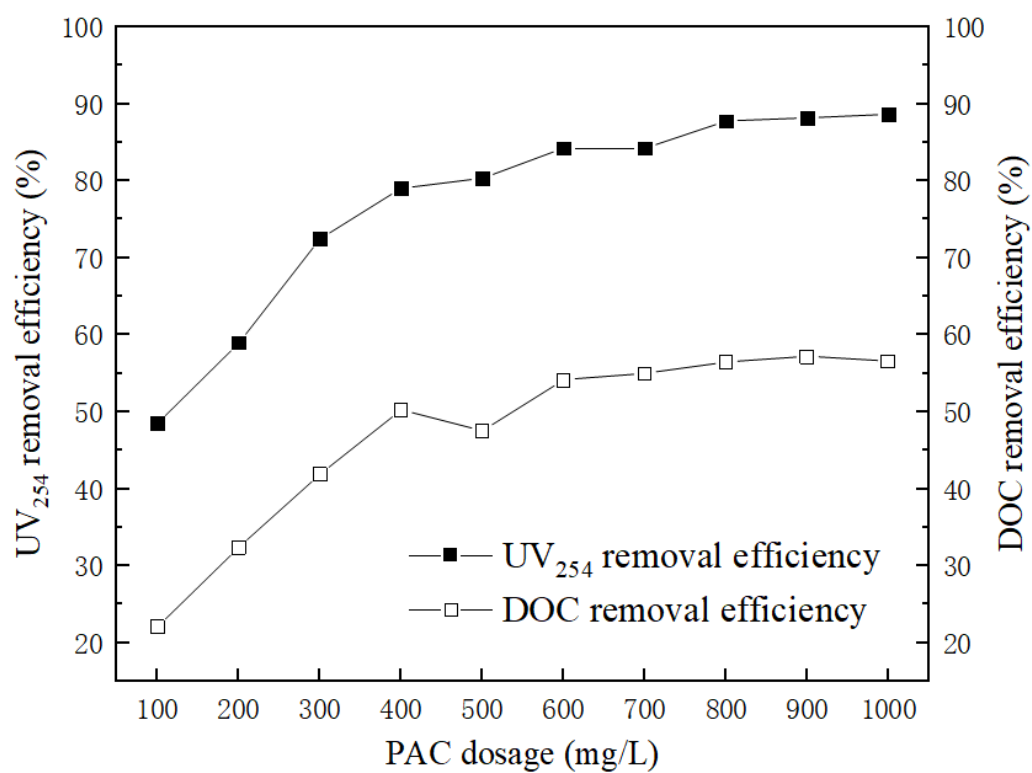

Figure S3. The optimization of the adsorption process.
